# Supplementary material
Source: PubMed Central journal article supplement (PMC3406131)
Supplement: AEM.00550-12_zam999103536so1.pdf [file AEM.00550-12_zam999103536so1.pdf]

Table S1. Statistical differences between the ratios of positive and negative LA-MRSA samples across various sampling points and different seasons.

| Compared variables                                  | No. of compared samples per variable | Cochrans Q; Degrees of freedom; p-value |
|-----------------------------------------------------|--------------------------------------|-----------------------------------------|
| soil 300 m, soil 150 m, soil 50 m, soil 100 m       | 16                                   | 8.3333 ; 3; 0.0396                      |
| air 150 m, air 50 m, air 100 m                      | 21                                   | 3.5000; 2; 0.1738                       |
| spring (Sp.), summer (S.), autumn (A.), winter (W.) | 33                                   | 9.0000; 3; 0.0293                       |
